# Supplementary material
Source: MDPI journal article supplement (https://www.mdpi.com/2073-4441/15/6/1251)
Supplement: s1 [file s1]

## Supplementary Information

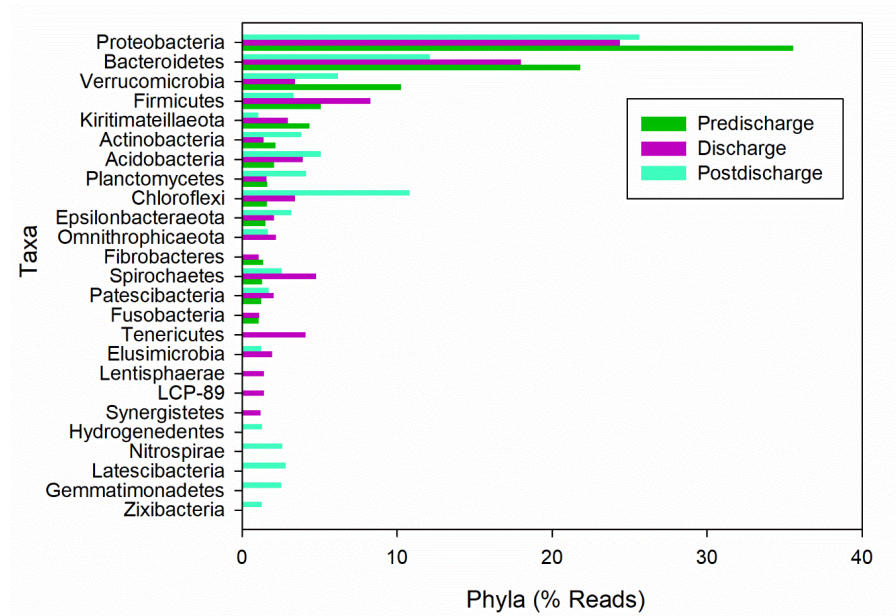

Figure S1: Graph representation of SIMPER analysis comparing the most dominant phyla between pre discharge, discharge and post discharge stations.

Table S1: Benthic microbial community comparison between winter (W) and summer (S) sequences reads retrieved at El Sauce estuary sampling stations.

| Domain   | Phylum              | F2W   | F2S  | F3*W  | F3*S  | E7W   | E10W  | E10S  | E11W  | E11S  |
|----------|---------------------|-------|------|-------|-------|-------|-------|-------|-------|-------|
| Archaea  | Altiarchaeota       | 0     | 0    | 0     | 0     | 0     | 2     | 0     | 7     | 2     |
| Archaea  | Asgardaeota         | 0     | 0    | 24    | 13    | 0     | 47    | 559   | 59    | 180   |
| Archaea  | Crenarchaeota       | 0     | 0    | 25    | 18    | 5     | 18    | 313   | 169   | 122   |
| Archaea  | Diapherotrites      | 0     | 0    | 145   | 2     | 3     | 0     | 75    | 112   | 46    |
| Archaea  | Euryarchaeota       | 3     | 46   | 2217  | 296   | 109   | 11    | 884   | 621   | 1076  |
| Archaea  | Hadesarchaeaeota    | 0     | 0    | 0     | 2     | 0     | 0     | 0     | 0     | 2     |
| Archaea  | Nanoarchaeaeota     | 31    | 120  | 774   | 972   | 149   | 601   | 1783  | 2109  | 2586  |
| Archaea  | Thaumarchaeota      | 0     | 0    | 11    | 0     | 43    | 0     | 749   | 27    | 67    |
| Bacteria | Acetothermia        | 0     | 0    | 10    | 0     | 0     | 0     | 0     | 3     | 2142  |
| Bacteria | Acidobacteria       | 388   | 545  | 5006  | 2833  | 4322  | 6928  | 11231 | 5844  | 4732  |
| Bacteria | Actinobacteria      | 288   | 132  | 6496  | 541   | 3519  | 5308  | 2642  | 2685  | 3085  |
| Bacteria | Aegiribacteria      | 0     | 0    | 288   | 0     | 17    | 0     | 11    | 8     | 22    |
| Bacteria | Armatimonadetes     | 6     | 16   | 471   | 117   | 65    | 174   | 510   | 127   | 253   |
| Bacteria | Atribacteria        | 0     | 0    | 7     | 0     | 0     | 0     | 0     | 0     | 44    |
| Bacteria | BRC1                | 4     | 7    | 65    | 57    | 36    | 78    | 200   | 121   | 243   |
| Bacteria | Bacteroidetes       | 44002 | 8323 | 55008 | 54948 | 58332 | 30231 | 30453 | 53409 | 25385 |
| Bacteria | CK-2C2-2            | 0     | 0    | 0     | 5     | 0     | 0     | 21    | 0     | 14    |
| Bacteria | Caldiserica         | 0     | 4    | 1022  | 22    | 60    | 0     | 21    | 0     | 67    |
| Bacteria | Calditrichaeota     | 0     | 0    | 162   | 4     | 3     | 0     | 50    | 11    | 308   |
| Bacteria | Chlamydiae          | 43    | 15   | 392   | 158   | 277   | 97    | 258   | 64    | 93    |
| Bacteria | Chloroflexi         | 177   | 547  | 8725  | 1862  | 1971  | 38728 | 18664 | 25509 | 20005 |
| Bacteria | Cloacimonetes       | 2     | 78   | 307   | 785   | 7     | 6     | 33    | 72    | 76    |
| Bacteria | Cyanobacteria       | 82981 | 3137 | 1945  | 21366 | 10416 | 23644 | 13876 | 20707 | 16261 |
| Bacteria | Dadabacteria        | 0     | 0    | 0     | 0     | 2     | 0     | 0     | 4     | 0     |
| Bacteria | Deinococcus-Thermus | 0     | 0    | 0     | 0     | 0     | 0     | 0     | 0     | 47    |
| Bacteria | Dependentiae        | 6     | 0    | 1092  | 41    | 217   | 188   | 256   | 56    | 196   |
| Bacteria | Elusimicrobia       | 61    | 92   | 2277  | 747   | 244   | 153   | 487   | 595   | 752   |
| Bacteria | Epsilonbacteraeota  | 154   | 49   | 9541  | 739   | 3112  | 4602  | 638   | 2976  | 2952  |
| Bacteria | FBP                 | 0     | 0    | 4     | 6     | 14    | 2     | 16    | 0     | 5     |
| Bacteria | FCPU426             | 0     | 12   | 162   | 103   | 8     | 8     | 42    | 79    | 61    |
| Bacteria | Fibrobacteres       | 88    | 47   | 214   | 519   | 27    | 155   | 410   | 331   | 420   |
| Bacteria | Firmicutes          | 1539  | 1615 | 14477 | 10825 | 1825  | 1405  | 2696  | 2652  | 3406  |
| Bacteria | Fusobacteria        | 106   | 30   | 172   | 284   | 161   | 29    | 45    | 71    | 71    |
| Bacteria | GN01                | 0     | 0    | 17    | 0     | 0     | 0     | 6     | 0     | 0     |
| Bacteria | Gemmatimonadetes    | 44    | 10   | 133   | 134   | 1738  | 1478  | 2165  | 2031  | 747   |
| Bacteria | Halanaerobiaeota    | 0     | 0    | 0     | 0     | 0     | 8     | 10    | 0     | 11    |
| Bacteria | Hydrogenedentes     | 63    | 47   | 56    | 448   | 378   | 194   | 461   | 190   | 458   |

|                 |                               |       |       |        |        |        |        |       |        |        |
|-----------------|-------------------------------|-------|-------|--------|--------|--------|--------|-------|--------|--------|
| <b>Bacteria</b> | Kiritimatiellaeota            | 1204  | 437   | 1502   | 3056   | 195    | 256    | 278   | 356    | 831    |
| <b>Bacteria</b> | LCP-89                        | 10    | 138   | 332    | 1012   | 13     | 0      | 33    | 68     | 132    |
| <b>Bacteria</b> | Latescibacteria               | 19    | 47    | 270    | 172    | 145    | 755    | 4869  | 2185   | 1945   |
| <b>Bacteria</b> | Lentisphaerae                 | 47    | 47    | 428    | 496    | 118    | 91     | 242   | 487    | 138    |
| <b>Bacteria</b> | Margulisbacteria              | 0     | 7     | 194    | 48     | 5      | 0      | 42    | 9      | 41     |
| <b>Bacteria</b> | Marinimicrobia (SAR406 clade) | 0     | 0     | 0      | 0      | 0      | 0      | 0     | 0      | 2      |
| <b>Bacteria</b> | Modulibacteria                | 2     | 0     | 20     | 0      | 0      | 0      | 0     | 0      | 18     |
| <b>Bacteria</b> | Nitrospinae                   | 9     | 0     | 0      | 15     | 74     | 0      | 45    | 0      | 183    |
| <b>Bacteria</b> | Nitrospirae                   | 28    | 173   | 27     | 192    | 197    | 862    | 5187  | 2312   | 911    |
| <b>Bacteria</b> | Omnitrophicaeota              | 14    | 100   | 3464   | 817    | 311    | 359    | 1122  | 606    | 1419   |
| <b>Bacteria</b> | PAUC34f                       | 0     | 0     | 0      | 0      | 0      | 0      | 15    | 26     | 22     |
| <b>Bacteria</b> | Patescibacteria               | 659   | 131   | 4272   | 1287   | 1199   | 967    | 1831  | 2739   | 2418   |
| <b>Bacteria</b> | Planctomycetes                | 182   | 145   | 383    | 1145   | 816    | 4440   | 5959  | 3014   | 4070   |
| <b>Bacteria</b> | Proteobacteria                | 79993 | 23951 | 100164 | 119601 | 151523 | 144983 | 96890 | 140764 | 100876 |
| <b>Bacteria</b> | Rokubacteria                  | 2     | 9     | 50     | 44     | 13     | 55     | 249   | 16     | 63     |
| <b>Bacteria</b> | Spirochaetes                  | 112   | 552   | 7861   | 4014   | 368    | 488    | 4350  | 1876   | 2719   |
| <b>Bacteria</b> | Synergistetes                 | 2     | 34    | 519    | 194    | 29     | 17     | 5     | 53     | 93     |
| <b>Bacteria</b> | TA06                          | 0     | 0     | 0      | 0      | 0      | 0      | 0     | 0      | 2      |
| <b>Bacteria</b> | Tenericutes                   | 54    | 320   | 10145  | 2525   | 1103   | 13     | 40    | 166    | 399    |
| <b>Bacteria</b> | Thermotogae                   | 0     | 0     | 86     | 0      | 0      | 0      | 5     | 0      | 10     |
| <b>Bacteria</b> | Verrucomicrobia               | 14017 | 1859  | 1804   | 12730  | 6731   | 7565   | 5362  | 7356   | 6256   |
| <b>Bacteria</b> | WOR-1                         | 0     | 3     | 340    | 55     | 53     | 2      | 48    | 29     | 233    |
| <b>Bacteria</b> | WPS-2                         | 0     | 20    | 0      | 107    | 57     | 5      | 0     | 13     | 0      |
| <b>Bacteria</b> | WS1                           | 0     | 0     | 9      | 7      | 0      | 6      | 96    | 25     | 41     |
| <b>Bacteria</b> | WS2                           | 0     | 0     | 4      | 0      | 0      | 0      | 29    | 0      | 12     |
| <b>Bacteria</b> | WS4                           | 0     | 0     | 85     | 0      | 2      | 5      | 17    | 0      | 46     |
| <b>Bacteria</b> | Zixibacteria                  | 0     | 20    | 730    | 45     | 42     | 103    | 1170  | 649    | 2247   |

\*Discharge sampling station

Table S2: Spearman correlation analyses between functional group abundance quantification (qPCR) and the physicochemical variables studied.

|                                 | <b>Ammonia<br/>Oxidizers</b> | <b>Comammox</b> | <b>Methanotrophs</b> | <b>Methanogens</b> |
|---------------------------------|------------------------------|-----------------|----------------------|--------------------|
| <b>Water Temperature (°C)</b>   | 0.385                        | <b>0.711 *</b>  | <b>0.661 *</b>       | 0.559              |
| pH (pH unit)                    | 0.250                        | 0.200           | 0.300                | 0.236              |
| <b>Conductivity (µS/cm)</b>     | 0.033                        | <b>0.683 *</b>  | 0.650                | 0.552              |
| Dissolved Oxygen (mg/L)         | 0.183                        | 0.283           | 0.317                | 0.406              |
| <b>DTS (mg/L)</b>               | 0.033                        | <b>0.683 *</b>  | 0.650                | 0.552              |
| Transparency (cm)               | -0.050                       | -0.201          | -0.251               | 0.215              |
| Turbidity (NTU)                 | -0.400                       | 0.067           | 0.050                | 0.103              |
| Color (Pt/C)                    | -0.233                       | -0.100          | -0.117               | -0.018             |
| Sulfate (mg/L)                  | -0.433                       | 0.283           | 0.233                | 0.600              |
| Chlorides (mg/L)                | -0.075                       | -0.142          | -0.142               | 0.280              |
| Total Coliforms (NMP)           | -0.025                       | -0.050          | -0.067               | -0.134             |
| Fecal Coliforms (NMP)           | 0.101                        | 0.050           | 0.067                | 0.061              |
| <b>BOD<sub>5</sub> (mg/L)</b>   | 0.367                        | <b>0.833 **</b> | <b>0.850 ***</b>     | 0.103              |
| Chlorophyll a (mg/L)            | 0.500                        | 0.550           | 0.517                | 0.091              |
| CO <sub>2</sub> (µM)            | -0.133                       | -0.367          | -0.383               | -0.224             |
| CH <sub>4</sub> (nM)            | -0.083                       | 0.167           | 0.033                | 0.455              |
| N <sub>2</sub> O (nM)           | -0.200                       | -0.033          | -0.083               | 0.139              |
| Nitrate (mg/L)                  | 0.483                        | 0.217           | 0.233                | -0.418             |
| Nitrite (mg/L)                  | 0.350                        | 0.417           | 0.450                | -0.079             |
| <b>Phosphate (mg/L)</b>         | -0.050                       | -0.600          | -0.533               | <b>-0.927 ***</b>  |
| Silicate (mg/L)                 | -0.250                       | -0.433          | -0.450               | 0.018              |
| Nitrate/Phosphate               | 0.483                        | 0.517           | 0.533                | 0.370              |
| <b>Total Organic Matter (g)</b> | 0.333                        | <b>0.700 *</b>  | <b>0.667 *</b>       | 0.576              |
| C/N                             | -0.083                       | -0.317          | -0.267               | 0.018              |
| <b>δ<sup>15</sup>N</b>          | <b>0.833 **</b>              | <b>0.717 *</b>  | <b>0.700 *</b>       | 0.346              |
| Gravel (g)                      | 0.100                        | 0.033           | 0.117                | -0.261             |
| Very Coarse Sand (g)            | 0.267                        | 0.300           | 0.333                | 0.236              |
| Coarse Sand (g)                 | -0.500                       | -0.033          | -0.150               | 0.358              |
| Medium Sand (g)                 | -0.583                       | -0.367          | -0.417               | 0.127              |
| Fine Sand (g)                   | -0.433                       | -0.333          | -0.317               | -0.164             |
| Very Fine Sand (g)              | 0.433                        | 0.533           | 0.567                | 0.139              |
| Silt (g)                        | 0.450                        | -0.083          | -0.050               | -0.079             |

Significant level (\* < 0.05, \*\* < 0.01, \*\*\* < 0.001)
